# Supplementary material for: Mouse Umbilical Cord Mesenchymal Stem Cell Paracrine Alleviates Renal Fibrosis in Diabetic Nephropathy by Reducing Myofibroblast Transdifferentiation and Cell Proliferation and Upregulating MMPs in Mesangial Cells
Source: Hindawi journal article supplement (doi:10.1155/2020/3847171), 2020-05-05
Supplement: f1 [file 3847171.f1.pdf]

# Mouse umbilical cord mesenchymal stem cell paracrine alleviates renal fibrosis in diabetic nephropathy by reducing myofibroblast transdifferentiation and cell proliferation and upregulating MMPs in mesangial cells

Hongde Li <sup>a,b,c</sup>, Pengfei Rong <sup>a,b,c</sup>, Xiaoqian Ma <sup>a,b</sup>, Wei Nie <sup>a,b</sup>, Yan chen<sup>d</sup>, Juan Zhang <sup>a,b</sup>, Qiong Dong <sup>a,b</sup>, Min Yang <sup>a,b</sup>, Wei Wang <sup>a,b,c,d</sup> \*

<sup>a</sup> Cell Transplantation and Gene Therapy Institute, The Third Xiangya Hospital of Central South University, Changsha, Hunan, China

<sup>b</sup> Department of Radiology, The Third Xiangya Hospital of Central South University, Changsha, Hunan, China

<sup>c</sup> Postdoctoral Research Station of Special Medicine, The Third Xiangya Hospital of Central South University, Changsha, Hunan, China

<sup>d</sup> Department of pathology, the third Xiangya Hospital of Central South University, Changsha, Hunan, China

<sup>e</sup> Engineering and Technology Research Center for Xenotransplantation of Hunan Province, Changsha, China

\* Corresponding author: Cell Transplantation and Gene Therapy Institute, The Third Xiangya Hospital of Central South University, Changsha, Hunan, China. E-mail address:

cjr.wangwei@vip.163.com

## Supplementary Figures and Legends

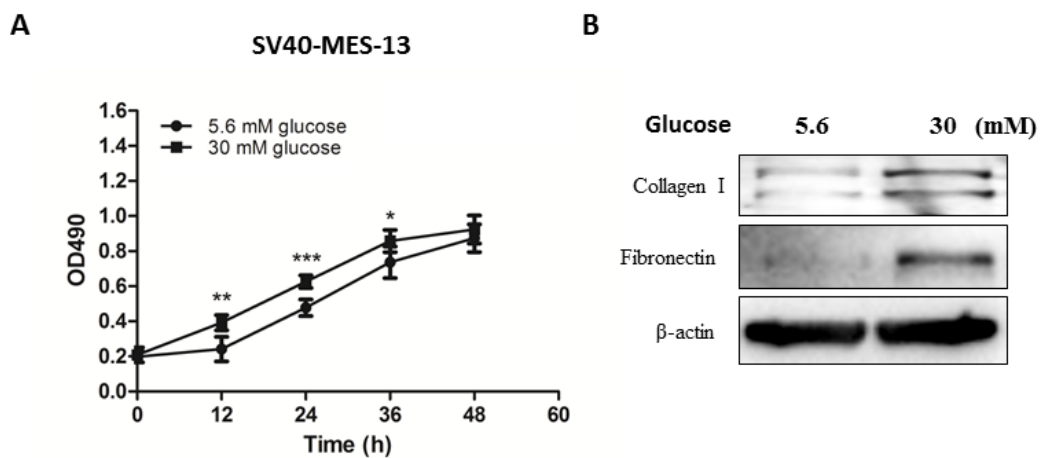

Figure S1. The DN cell model based on high glucose-cultured mesangial cells. (A)

Measurement of cell proliferation in high glucose-induced SV40-MES-13 cells. **(B)** Western blot analysis of the levels of ECM proteins in high glucose-induced SV40-MES-13 cells.

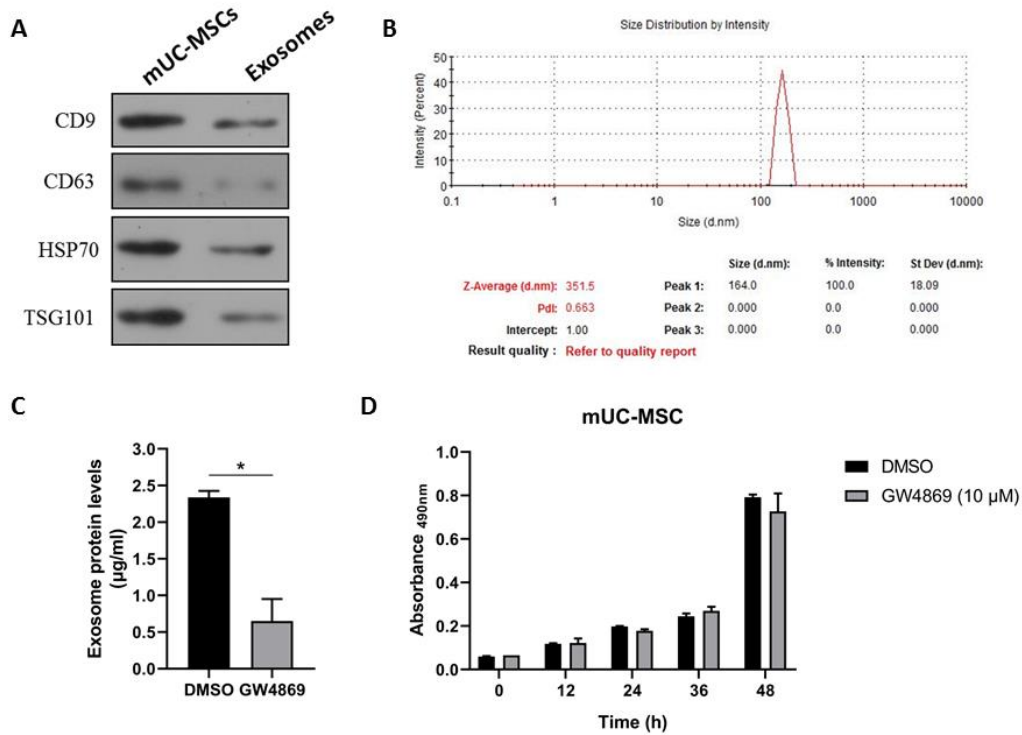

**Figure S2. Inhibitory effect of GW4869 on the secretion of exosomes from mUC-MSCs** (A) Identification of exosome markers. (B) Detection of exosome particle size and purity. (C) GW4869 decreases the levels of exosome protein from mUC-MSCs. Each value represents the mean ( $\pm$  SD) of a representative of 3 independent experiments. Statistical significance: \* $p < 0.05$  versus negative control. (D) 10  $\mu$ M GW4869 is shown not to affect cell proliferation of mUC-MSC cells.
